# Supplementary material for: CD74 interacts with CD44 and enhances tumorigenesis and metastasis via RHOA-mediated cofilin phosphorylation in human breast cancer cells
Source: PubMed Central journal article supplement (PMC5356556; doi:10.18632/oncotarget.11945), 2016-09-10
Supplement: oncotarget-07-68303-s001.pdf [file oncotarget-07-68303-s001.pdf]

## CD74 interacts with CD44 and enhances tumorigenesis and metastasis via RHOA-mediated cofilin phosphorylation in human breast cancer cells

### Supplementary Materials

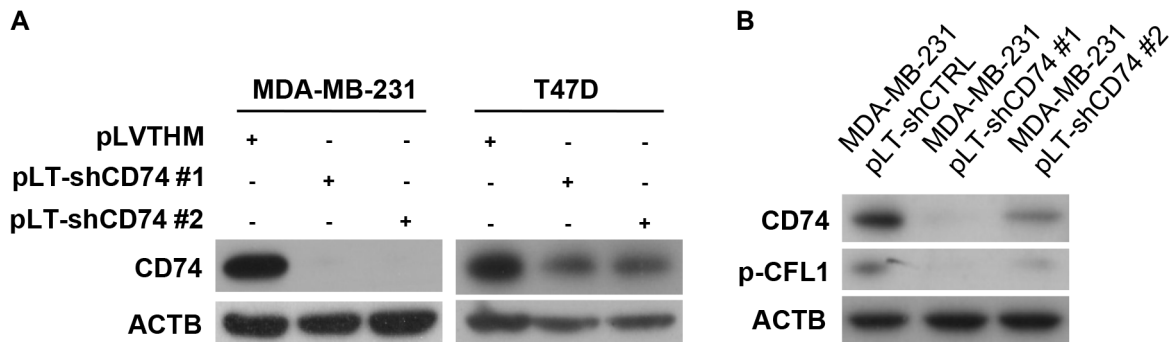

**Supplementary Figure S1: Detection of CD74 expression level.** (A) CD74 was knocked down using CD74 shRNA contained vector in MDA-MB-231 and T47D cells, CD74 level was assayed by western blot. (B) CD74 expression level in MDA-MB-231 pLT-shN. C., MDA-MB-231 pLT-shCD74 #1 and MDA-MB-231 pLT-shCD74 #2 cell lines were detected by western blot.

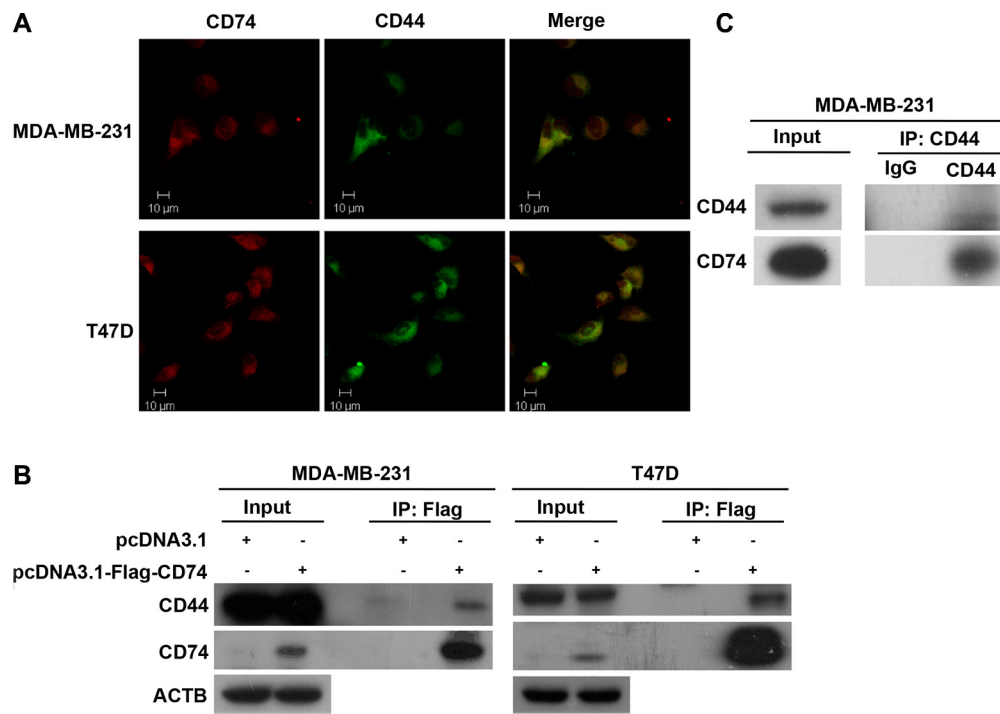

**Supplementary Figure S2: CD74 binds to CD44 in human breast cancer cells.** (A) For immunofluorescence, CD74 was stained with AlexaFluor 568 dye (red), CD44 was stained with AlexaFluor 488 dye (green), yellow staining showed that CD74 colocalized with CD44. (B) MDA-MB-231 and T47D cells were transfected with pcDNA3.1 or pcDNA3.1-Flag-CD74, cell lysate was immunoprecipitated with anti-Flag antibody, CD74 and CD44 were detected by western blot. (C) For immunoprecipitation, MDA-MB-231 cell lysate was separated into two group and incubated with IgG antibody and CD44 antibody at 4°C for 1 h, respectively. Then, cell lysate incubated with protein G at 4°C overnight, CD74 and CD44 protein were detected by western blot.

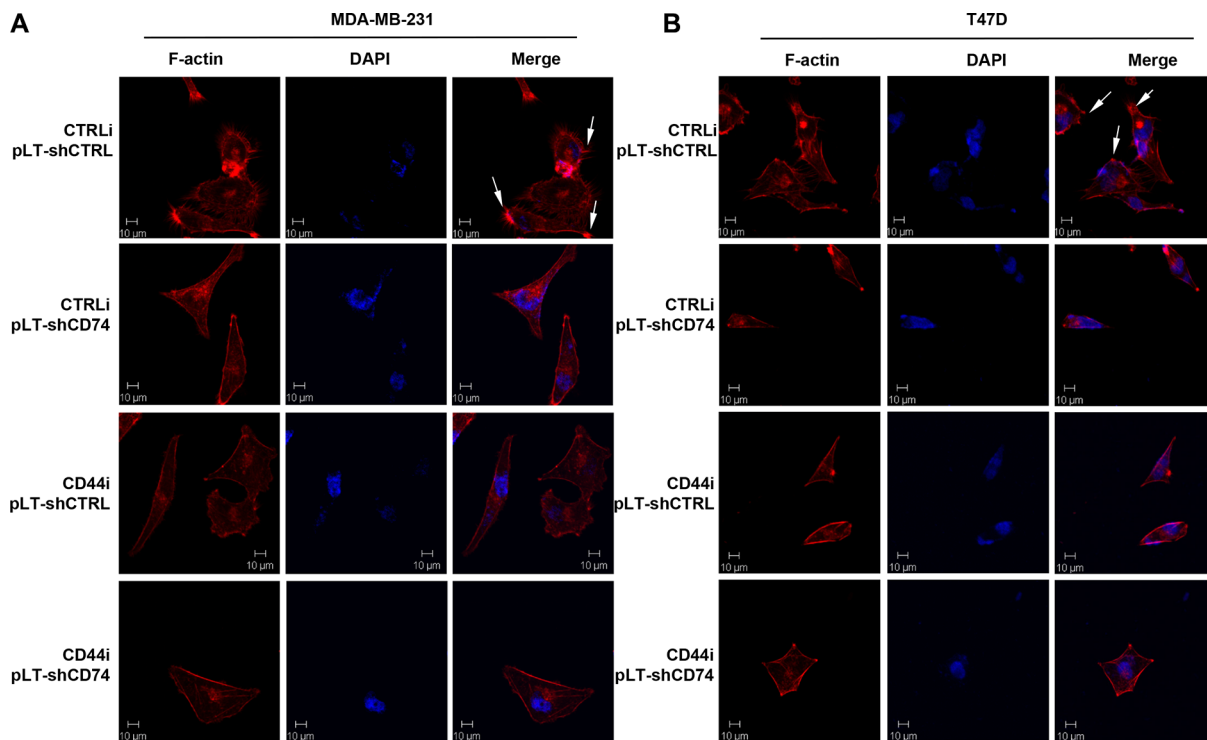

**Supplementary Figure S3: Knockdown of CD74 or/and CD44 decreased cell protrusion formation.** (A) Knockdown of CD74, CD44 or double knockdown of CD74 and CD44 were performed in MDA-MB-231 cells, the cells were resuspended and reseeded onto adhesion microscope slides after 24 h of transfection, F-actin was stained with TRITC-conjugated phalloidin (red), nuclei was visualized with DAPI (blue). Cell morphology was detected by confocal laser scanning microscopy. (B) T47D cells were treated similar to MDA-MB-231 cells, and representative images are shown as indicated. Arrows stand for the typical protrusions.

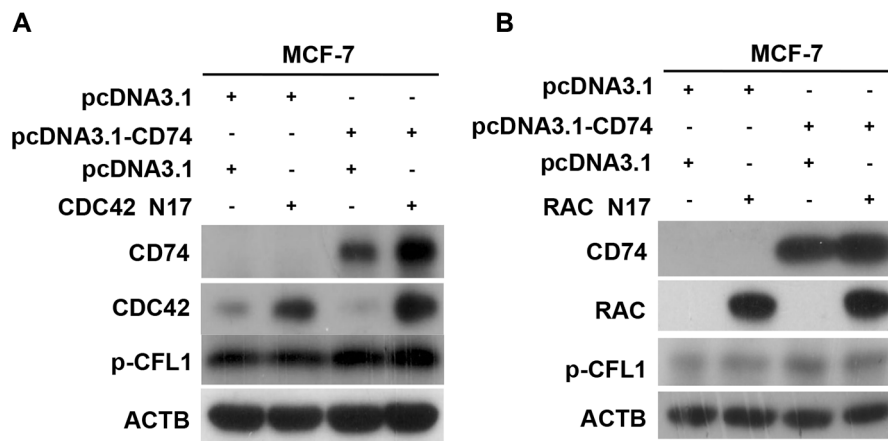

**Supplementary Figure S4: Inhibition of CDC42 or RAC minimally down-regulated CFL1 phosphorylation.** (A) MCF-7 cells were co-transfected with CD74 and CDC42 N17 (Dominant Negative), western blot analysis showed the phosphorylation of CFL1. (B) MCF-7 cells were co-transfected with CD74 and RAC N17 (Dominant Negative), CFL1 phosphorylation was assessed by western blot assay.

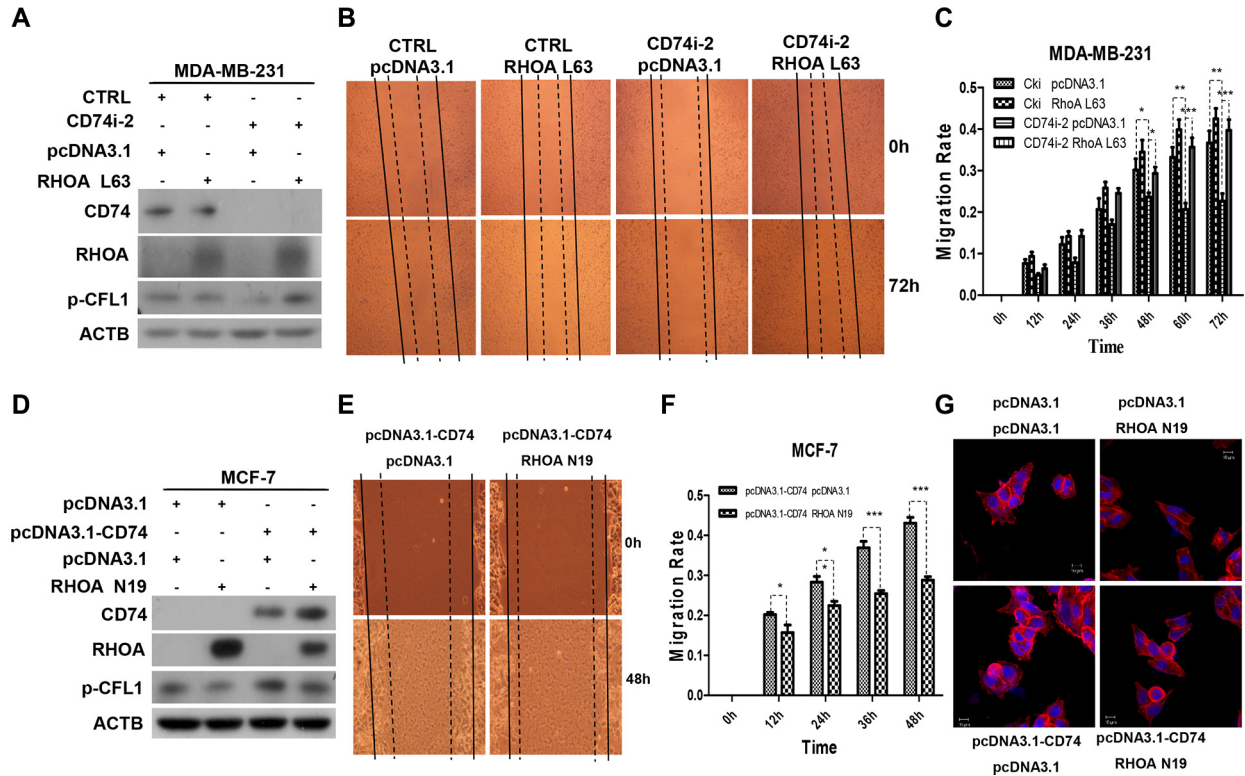

**Supplementary Figure S5: RHOA is required for CD74 and p-CFL1-dependent cell migration.** (A) MDA-MB-231 cells were co-transfected with CD74 shRNA contained plasmid and RHOA L63 (Constitutively Active) vector, RHOA-dependent CFL1 phosphorylation was analyzed by western blotting. (B) MDA-MB-231 cells were subjected to wound-healing scratch assay after transfecting as described above, cell were allowed to recover for 72 h. Representative images of cell recover are shown on the right. (C) Differences between groups were analyzed by *t*-test. The error bars represent the SD, \* $P < 0.05$ ; \*\* $P < 0.01$ ; \*\*\* $P < 0.001$ . (D) MCF-7 cells were co-transfected with pcDNA3.1-CD74 and RHOA N19 (Dominant Negative) plasmids, RHOA regulated CFL1 phosphorylation was detected by immunoblot assay. (E) Wound-healing scratch assay was conducted after MCF-7 cotransfected with CD74 and RHOA N19. Cells were allowed to recover for 48 h. Representative images of cell recover are shown. (F) Differences between pcDNA3.1 plasmid transfected group and RHOA N19 plasmid transfected group were analyzed by *t*-test. The error bars represent the SD, \* $p$ -value  $< 0.05$  and \*\*\* $p$ -value  $< 0.001$ . (G) MCF-7 cells were co-transfected with CD74 and RHOA N19 for 24 h, then, re-suspended cells were re-seeded onto adhesion microscope slides, F-actin was stained with TRITC-conjugated phalloidin (red), nuclei was visualized with DAPI (blue).

**Supplementary Table S1: 189 cases of B IDC patients' features**

| Patients characteristics | No. of patients (%) |
|--------------------------|---------------------|
| Age (years)              |                     |
| ≤ 45                     | 91 (48.1)           |
| > 45                     | 98 (51.9)           |
| Clinical stages          |                     |
| Stage I                  | 9 (4.8)             |
| Stage II                 | 109 (57.7)          |
| Stage III                | 50 (26.5)           |
| Stage IV                 | 21 (11.1)           |
| Lymph node status        |                     |
| N0                       | 49 (26.0)           |
| N1/N2/N3                 | 140 (74.0)          |
| Pathological grades      |                     |
| Well                     | 11 (5.8)            |
| Moderate                 | 106 (56.1)          |
| Poor                     | 72 (38.1)           |
| Survival status          |                     |
| Alive                    | 144 (76.2)          |
| Death                    | 45 (23.8)           |

**Supplementary Table S2: Comparison of CD74 protein expression in B IDC and non-cancerous control breast tissues**

| Features ( <i>n</i> )    | CD74               |                     | <i>P</i> -value |
|--------------------------|--------------------|---------------------|-----------------|
|                          | Low expression (%) | High expression (%) |                 |
| Cancer ( <i>n</i> = 189) | 46 (24.3)          | 143 (75.7)          | 0.000*          |
| NCBT( <i>n</i> = 40)     | 22 (55.0)          | 18 (45.0)           |                 |

\*Chi-square test, statistically significant difference ( $P < 0.05$ ). NCBT: non-cancerous control breast tissues.

**Supplementary Table S3: Multivariate logistic regression analysis of lymph node metastasis factors in B IDC patients ( $n = 189$ )**

| Variables         | B     | S.E. | Wald   | Sig.  | Exp (B) | 95.0% CI for Exp (B) |        |
|-------------------|-------|------|--------|-------|---------|----------------------|--------|
|                   |       |      |        |       |         | Lower                | Upper  |
| Clinical stages   | 1.863 | .529 | 12.418 | .000* | 6.446   | 2.286                | 18.172 |
| Pathologic grades | .067  | .420 | .025   | .873  | 1.069   | .469                 | 2.438  |
| Survival status   | .255  | .557 | .210   | .647  | 1.291   | .433                 | 3.848  |
| ER                | -.117 | .880 | .018   | .894  | .889    | .158                 | 4.989  |
| PR                | .372  | .875 | .181   | .670  | 1.451   | .261                 | 8.064  |
| CerbB-2           | .175  | .398 | .193   | .660  | 1.191   | .546                 | 2.596  |
| Age(years)        | .118  | .360 | .108   | .742  | 1.126   | .556                 | 2.278  |
| CD74              | 1.205 | .412 | 8.573  | .003* | 3.337   | 1.490                | 7.478  |

95% CI: 95% confidence interval. \* $P < 0.05$ .

**Supplementary Table S4: Analysis of the association between expression of CD74 protein and clinicopathological features of B IDC ( $n = 189$ )**

| Features                    | CD74               |                     | P-value |
|-----------------------------|--------------------|---------------------|---------|
|                             | Low expression (%) | High expression (%) |         |
| Age (years)                 |                    |                     |         |
| $\leq 45$ ( $n = 91$ )      | 21 (23.1)          | 70 (76.9)           |         |
| $> 45$ ( $n = 98$ )         | 25 (25.5)          | 73 (74.5)           | 0.697   |
| Pathological grades         |                    |                     |         |
| Well/Moderate ( $n = 117$ ) | 30 (25.6)          | 87 (74.4)           |         |
| Poor ( $n = 72$ )           | 16 (22.2)          | 56 (77.8)           | 0.595   |
| Clinical stages             |                    |                     |         |
| Stage I–II ( $n = 118$ )    | 23 (19.5)          | 95 (80.5)           |         |
| Stage III–IV ( $n = 71$ )   | 23 (32.4)          | 48 (67.6)           | 0.045*  |
| Lymph node status           |                    |                     |         |
| LNM ( $n = 140$ )           | 28 (20.0)          | 112 (80.0)          |         |
| No LNM ( $n = 49$ )         | 18 (36.7)          | 31 (63.3)           | 0.019*  |
| ER                          |                    |                     |         |
| Negative ( $n = 60$ )       | 17 (28.3)          | 43 (71.7)           |         |
| Positive ( $n = 129$ )      | 29 (22.5)          | 100 (77.5)          | 0.383   |
| PR                          |                    |                     |         |
| Negative ( $n = 65$ )       | 19 (29.2)          | 46 (70.8)           |         |
| Positive ( $n = 124$ )      | 27 (21.8)          | 97 (78.2)           | 0.256   |
| HER-2                       |                    |                     |         |
| Negative ( $n = 124$ )      | 31 (25.0)          | 93 (75.0)           |         |
| Positive ( $n = 65$ )       | 15 (23.1)          | 50 (76.9)           | 0.770   |
| Survival status             |                    |                     |         |
| Alive ( $n = 144$ )         | 33 (22.9)          | 111 (77.1)          |         |
| Death ( $n = 45$ )          | 13 (28.9)          | 32 (71.1)           | 0.415   |

\*Chi-square test, statistically significant difference ( $p < 0.05$ ). LNM: lymph node metastasis.  $P$  is used to test the association between expression of CD74 and the clinicopathological features of B IDC.
